# Supplementary material for: Synthesis, structure, characterization and photocatalytic activity of Bi2Zr2O7 under solar radiation
Source: Royal Society of Chemistry journal article supplement (doi:10.1039/c3ra43518k), 2013-01-01
Supplement: c3ra43518k.pdf [file c3ra43518k.pdf]

## **ELECTRONIC SUPPLEMENTARY INFORMATION**

# **Synthesis, structure, characterization and photocatalytic activity of $\text{Bi}_2\text{Zr}_2\text{O}_7$ under solar radiation**

Vaishali Sharma M, Dipankar Saha, Giridhar Madras \*, T. N. Guru Row \*

*Solid State and Structural Chemistry Unit, Indian Institute of Science,*

*Bangalore 560 012, India*

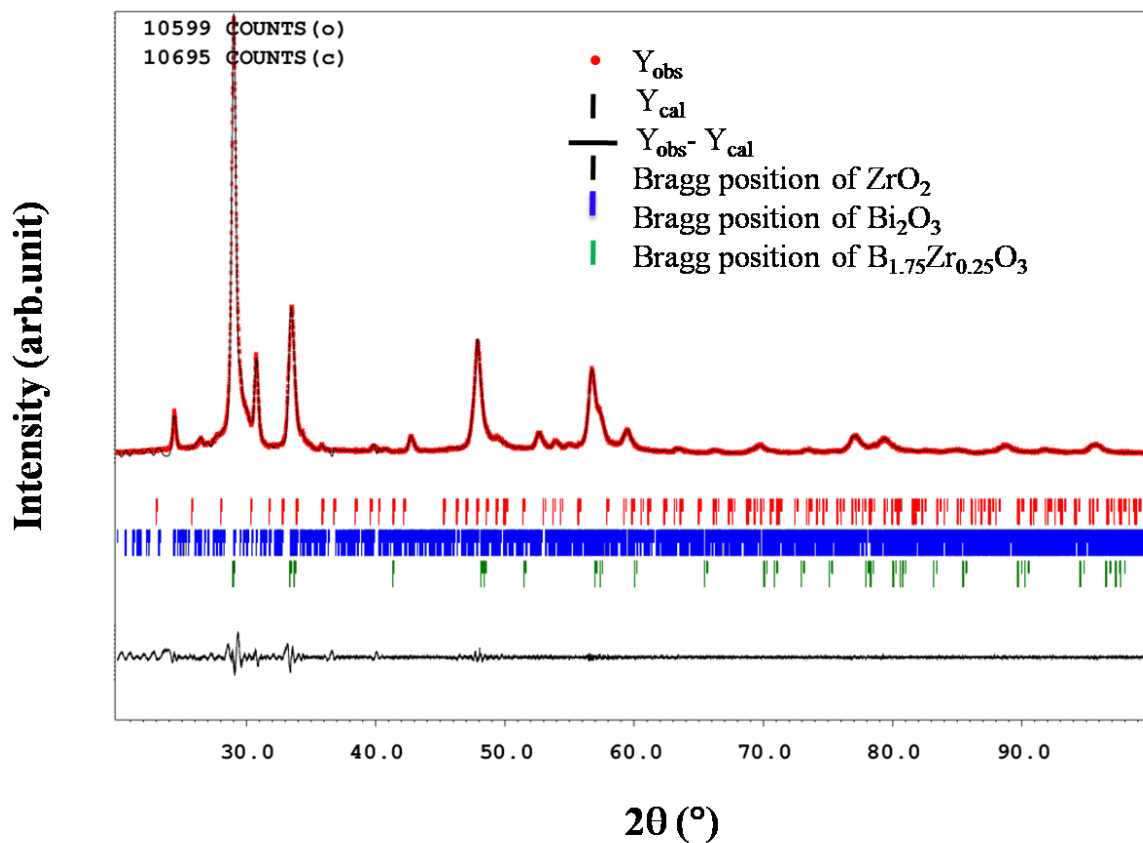

**Fig S1:** Fitting profile showing the formation of  $ZrO_2$ ,  $Bi_2O_3$  and  $Bi_{1.75}Zr_{0.25}O_3$  in case of BZO prepared using glycine as fuel.

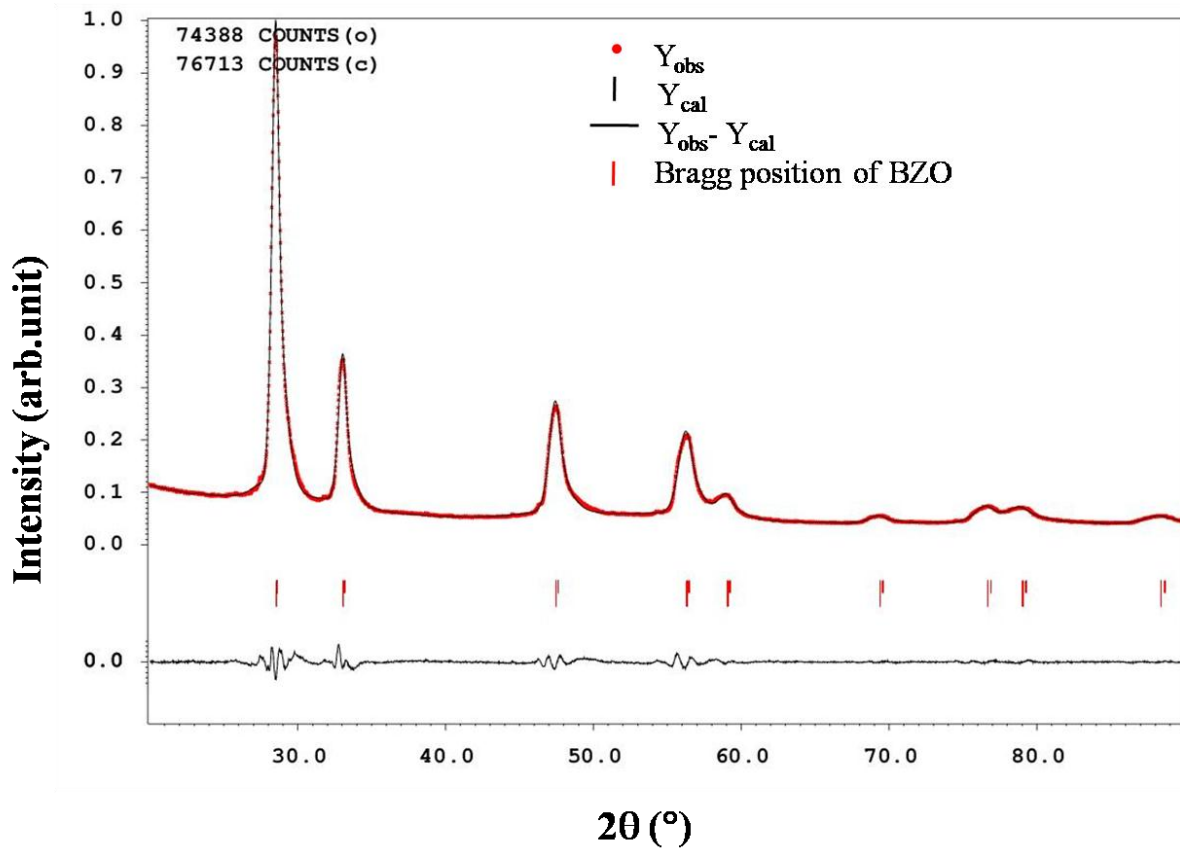

**Fig S2:** Profile fitting confirming the Space group and cell dimension for BZO compound.
